# Supplementary material for: CRISPR/Cas9-Mediated Generation of Mutant Lines in Medicago truncatula Indicates a Symbiotic Role of MtLYK10 during Nodule Formation
Source: MDPI journal article supplement (doi:10.3390/biology13010053), 2024-01-19
Supplement: s1 [file s1]

## Supplementary Figures

### **CRISPR/Cas9-Mediated Generation of Mutant Lines in *Medicago truncatula* Indicates a Symbiotic Role of *MtLYK10* during Nodule Formation**

Chun-Xiao Zhang, Ru-Jie Li, Laura Baude, Didier Reinhardt, Zhi-Ping Xie and Christian Staehelin

#### **This file includes:**

**Figure S1.** Illustration of the cloning procedure to generate CRISPR/Cas9 binary vectors with two sgRNA expression cassettes.

**Figure S2.** Identification of *M. truncatula* plants with mutations in *MtLYK10*, *MtMFS1* and *MtMFS2*.

**Figure S3.** PCR analysis of the P3 plant containing a deletion in *MtLYK10*.

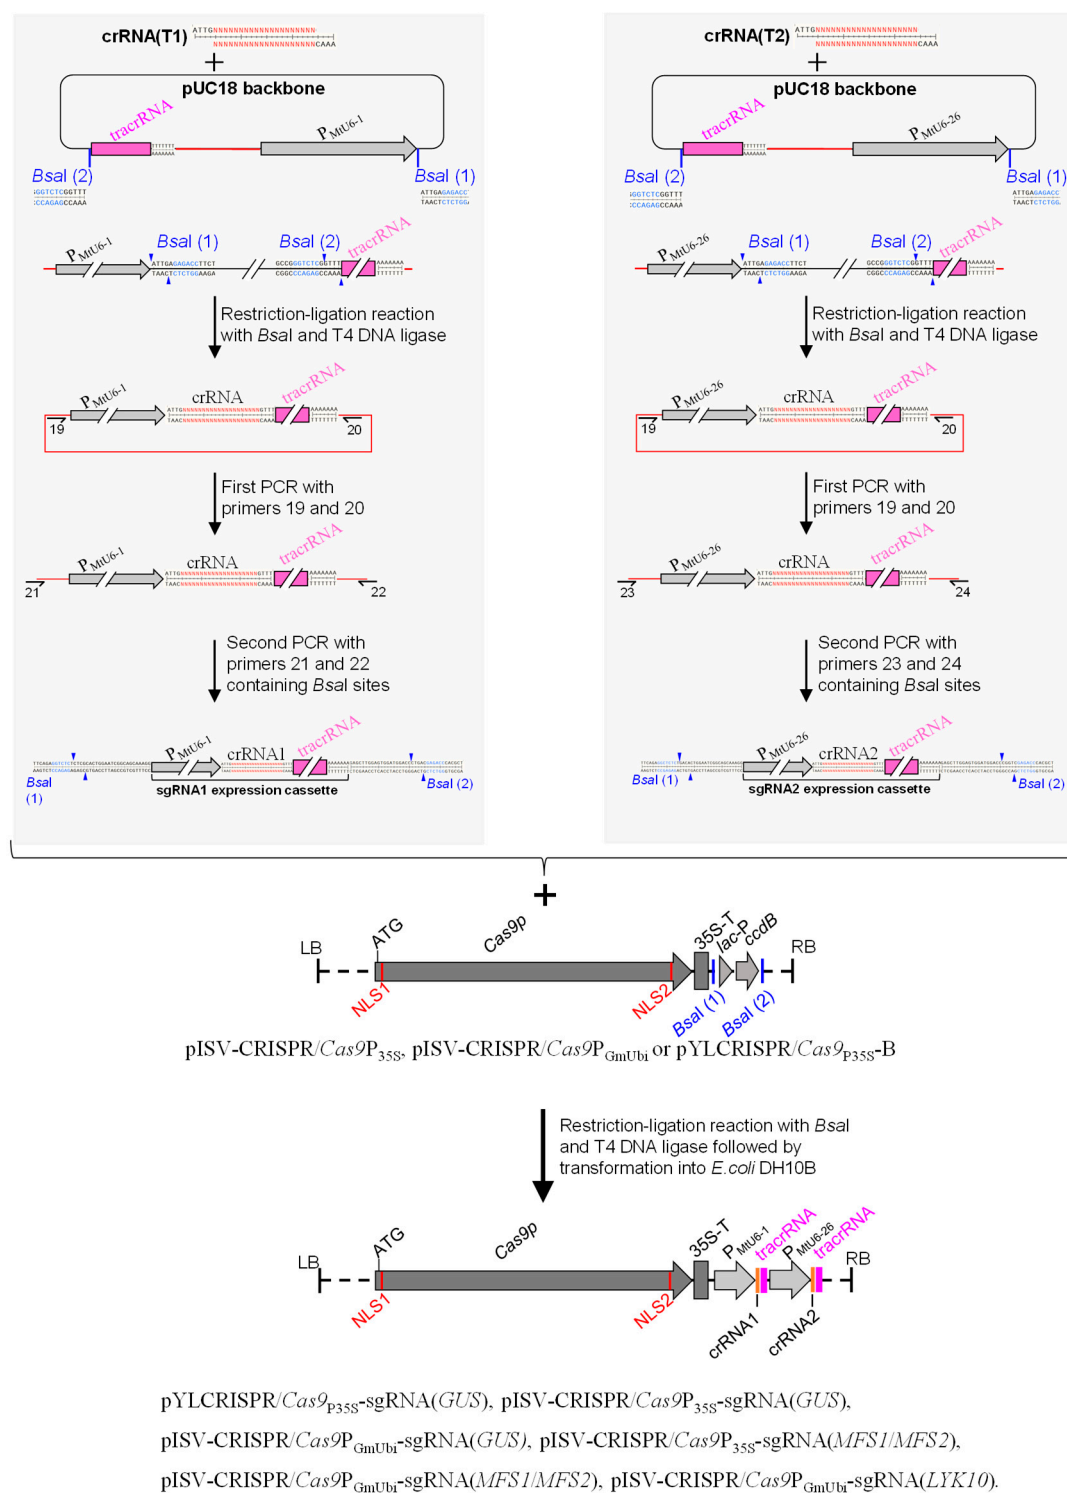

**Figure S1.** Illustration of the cloning procedure to generate CRISPR/Cas9 binary vectors with two sgRNA expression cassettes. For abbreviations, see legend to Figure 1.

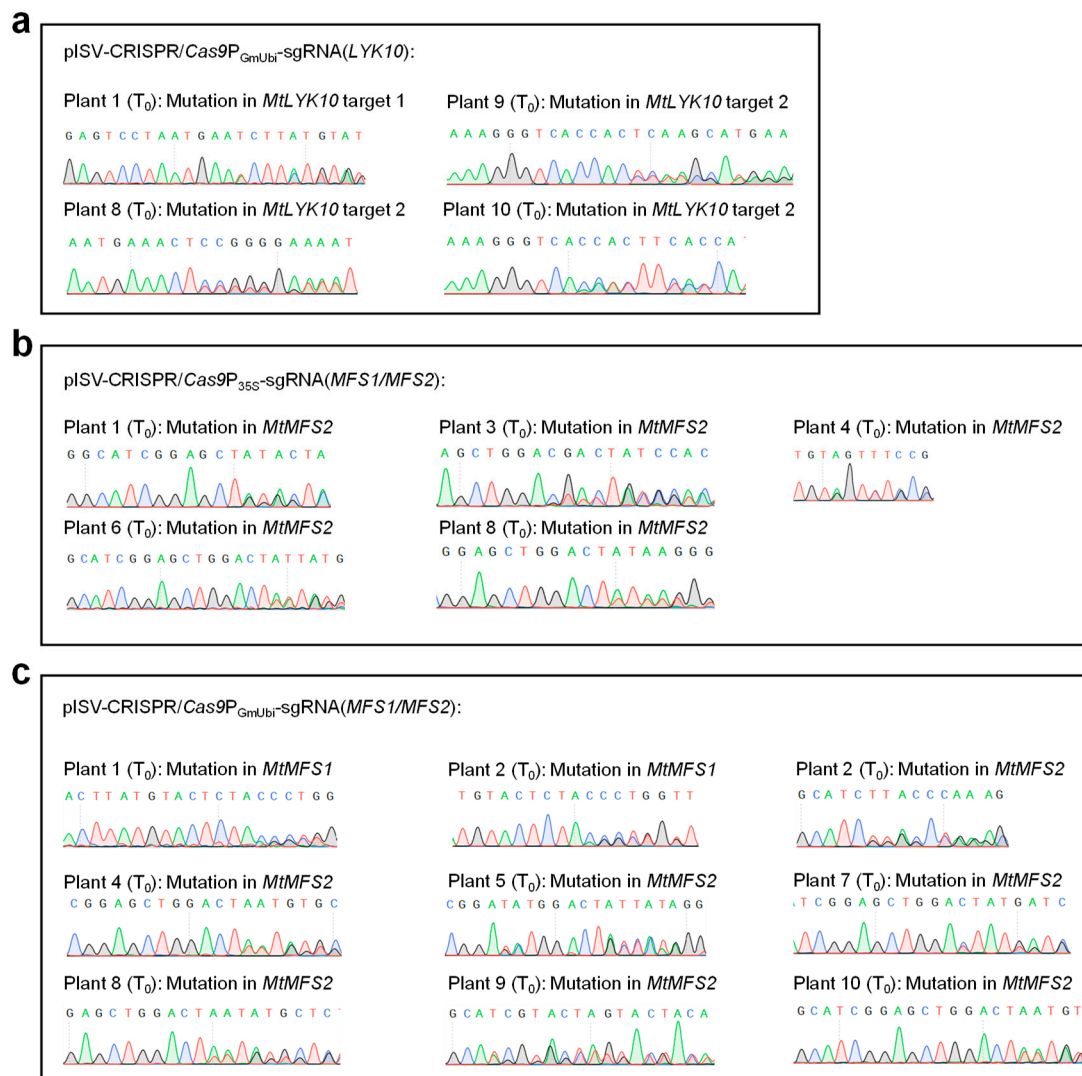

**Figure S2.** Identification of *M. truncatula* plants with mutations in *MtLYK10*, *MtMFS1* and *MtMFS2*. *M. truncatula* leaf explants were transformed with the indicated binary vectors. Leaf DNA of regenerated plants (T<sub>0</sub> generation) and gene specific primers were used for PCRs and the amplicons were directly sequenced. Sanger sequencing results are shown for plants with mutations at target sites (chromatograms with double peaks). (a) Plants transformed with pISV-CRISPR/Cas9P<sub>GmUbi</sub>-sgRNA(*LYK10*). (b) Plants transformed with pISV-CRISPR/Cas9P<sub>35S</sub>-sgRNA(*MFS1/MFS2*). (c) Plants transformed with pISV-CRISPR/Cas9P<sub>GmUbi</sub>-sgRNA(*MFS1/MFS2*).

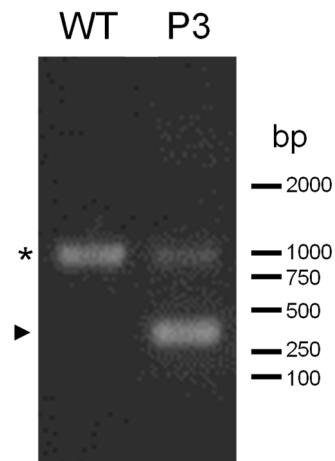

**Figure S3.** PCR analysis of the P3 plant containing a deletion in *MtLYK10*. *M. truncatula* leaf explants were transformed with pISV-CRISPR/*Cas9*<sub>GmUbi</sub>-sgRNA (*LYK10*) and a deletion in *MtLYK10* was identified in the P3 plant (T<sub>0</sub> generation) by sequencing. The picture shows an agarose gel with DNA amplified from genomic wild-type and P3 DNA using *MtLYK10* specific primers. Abbreviations: WT, *MtLYK10* DNA amplified from wild-type plants. P3, *MtLYK10* DNA amplified from the heterozygous P3 plant containing a *MtLYK10* wild-type allele (upper band marked by an asterisk) and a mutated *MtLYK10* allele with a 654-bp deletion (lower band marked by an arrowhead).

**Supplementary Tables**

CRISPR/Cas9-mediated generation of mutant lines in *Medicago truncatula* indicate a symbiotic role of *MtLYK10* during nodule formation

Chun-Xiao Zhang, Ru-Jie Li, Laura Baude, Didier Reinhardt, Zhi-Ping Xie and Christian Staehelin

**Table S1. Plasmids used in this study.**

| Plasmids                                   | Relevant characteristics                                                                                                                      | Reference/Source                                     |
|--------------------------------------------|-----------------------------------------------------------------------------------------------------------------------------------------------|------------------------------------------------------|
| pYLsgRNA-AtU6-1                            | Vector with a pUC18 backbone, tracrRNA and the AtU6-1 promoter of <i>A. thaliana</i> , Amp <sup>r</sup>                                       | [43]                                                 |
| pYLCRISPR/ <i>Cas9</i> P <sub>35S</sub> -B | Binary vector with a pCambia1300 backbone and <i>Cas9p/Bar</i> expression cassettes, Kan <sup>r</sup>                                         | [43]                                                 |
| pRT104- <i>DsRed1</i>                      | A 678-bp <i>DsRed1</i> fragment PCR-amplified from pX-DR and cloned into pRT104 digested with <i>Xba</i> I and <i>Xho</i> I, Amp <sup>r</sup> | [47]                                                 |
| pISV2678                                   | Derivative of pGPTV-BAR with an enhanced double CaMV 35S promoter. Kan <sup>r</sup>                                                           | Schultze and Kondorosi; CNRS, Gif-sur-Yvette, France |
| pUC-tracrRNA-P <sub>MtU6-1</sub>           | Vector with a pUC18 backbone, tracrRNA and the MtU6-1 promoter of <i>M. truncatula</i> R108, Amp <sup>r</sup>                                 | This study                                           |
| pUC-tracrRNA-P <sub>MtU6-26</sub>          | Vector with a pUC18 backbone, tracrRNA and the MtU6-1 promoter of <i>M. truncatula</i> R108, Amp <sup>r</sup>                                 | This study                                           |

|                                                                     |                                                                                                                                                                                                |            |
|---------------------------------------------------------------------|------------------------------------------------------------------------------------------------------------------------------------------------------------------------------------------------|------------|
| pMD19-P <sub>Gmubi</sub>                                            | P <sub>Gmubi</sub> (ubiquitin gene promoter of <i>G. max</i> cv. William 82) cloned into pMD-19, Amp <sup>r</sup>                                                                              | This study |
| pMD19- <i>DsRed1</i>                                                | <i>DsRed1</i> cassette from pRT104- <i>DsRed1</i> cloned into pMD-19, Amp <sup>r</sup>                                                                                                         | This study |
| pMD19- <i>DsRed1</i> (ΔB)                                           | Point mutated vector of pMD19- <i>DsRed1</i> without <i>BsaI</i> (ΔB) restriction site, Amp <sup>r</sup>                                                                                       | This study |
| pISV- <i>DsRed1</i> (ΔB)                                            | <i>DsRed1</i> (ΔB) expression cassette cloned into the <i>HindIII</i> site of pISV2678, Kan <sup>r</sup>                                                                                       | This study |
| pBS- <i>Cas9-ccdB</i>                                               | pBluescript II SK (+) derivative carrying <i>cas9p</i> and <i>ccdB</i> sequences from pYLCRISPR/ <i>Cas9P</i> <sub>35S</sub> -B, Amp <sup>r</sup>                                              | This study |
| pISV-CRISPR/ <i>Cas9P</i> <sub>35S</sub>                            | pISV- <i>DsRed1</i> (ΔB) derivative carrying <i>Cas9p</i> and <i>ccdB</i> sequences from pBS- <i>Cas9-ccdB</i> , Kan <sup>r</sup>                                                              | This study |
| pISV-CRISPR/ <i>Cas9P</i> <sub>GmUbi</sub>                          | pISV- <i>DsRed1</i> (ΔB) derivative carrying P <sub>Gmubi</sub> , the <i>cas9p</i> coding sequence and a <i>ccdB</i> expression cassette, Kan <sup>r</sup>                                     | This study |
| pYLCRISPR/ <i>Cas9P</i> <sub>35S</sub> -sgRNA( <i>GUS</i> )         | pYLCRISPR/ <i>Cas9P</i> <sub>35S</sub> -B derivative carrying two sgRNA expression cassettes for <i>GUSPlus</i> editing, Kan <sup>r</sup>                                                      | This study |
| pISV-CRISPR/ <i>Cas9P</i> <sub>35S</sub> -sgRNA( <i>GUS</i> )       | pISV-CRISPR/ <i>Cas9P</i> <sub>35S</sub> derivative carrying two sgRNA expression cassettes for <i>GUSPlus</i> editing, Kan <sup>r</sup>                                                       | This study |
| pISV-CRISPR/ <i>Cas9P</i> <sub>GmUbi</sub> -sgRNA( <i>GUS</i> )     | pISV-CRISPR/ <i>Cas9P</i> <sub>GmUbi</sub> derivative carrying two sgRNA expression cassettes for <i>GUSPlus</i> editing, Kan <sup>r</sup>                                                     | This study |
| pISV-CRISPR/ <i>Cas9P</i> <sub>35S</sub> -sgRNA( <i>MFS1/MFS2</i> ) | pISV-CRISPR/ <i>Cas9P</i> <sub>35S</sub> derivative carrying a sgRNA expression cassette for <i>MtMFS1</i> editing and a sgRNA expression cassette for <i>MtMFS2</i> editing, Kan <sup>r</sup> | This study |

|                                                                           |                                                                                                                                                                                                  |            |
|---------------------------------------------------------------------------|--------------------------------------------------------------------------------------------------------------------------------------------------------------------------------------------------|------------|
| pISV-CRISPR/ <i>Cas9P</i> <sub>GmUbi</sub> -<br>sgRNA( <i>MFS1/MFS2</i> ) | pISV-CRISPR/ <i>Cas9P</i> <sub>GmUbi</sub> derivative carrying a sgRNA expression cassette for <i>MtMFS1</i> editing and a sgRNA expression cassette for <i>MtMFS2</i> editing, Kan <sup>r</sup> | This study |
| pISV-CRISPR/ <i>Cas9P</i> <sub>GmUbi</sub> -sgRNA( <i>LYK10</i> )         | pISV-CRISPR/ <i>Cas9P</i> <sub>GmUbi</sub> derivative carrying two sgRNA expression cassettes for <i>MtLYK10</i> editing, Kan <sup>r</sup>                                                       | This study |

**Table S2. Primers used in this study.**

| Prim<br>ers | Sequences (5'→3')                                          | Restrictio<br>n sites         | Description                                                                                                                       | Amplico<br>n (bp) |
|-------------|------------------------------------------------------------|-------------------------------|-----------------------------------------------------------------------------------------------------------------------------------|-------------------|
| 1           | GATATCGAATTCCTGCAGCCCGGGTCTCCACTGA                         | <i>SmaI</i>                   | Amplification of <i>Cas9p</i> with nuclear<br>localization signals and a terminator sequence<br>from pYLCRISPR/ <i>Cas9P35S-B</i> | 4668              |
| 2           | CCGGTCAACATGTGGAGCACGACCGCGTCACTGG<br>ATTTTGGTT            |                               |                                                                                                                                   |                   |
| 3           | AACCAAAATCCAGTGACGCGGTCGTGCTCCACAT<br>GTTGACCGG            | <i>NotI</i>                   | Amplification of a <i>ccdB</i> expression cassette from<br>pYLCRISPR/ <i>Cas9P35S-B</i>                                           | 765               |
| 4           | CCGCGGTGGCGGCGCTCTAGATAGCTCGAGAG<br>GCGCGCCA               |                               |                                                                                                                                   |                   |
| 5           | TCGATTCTAGAGAATTCCCTTAATTAAGGGCCCA<br>ATATAACAACGACGTCG    | <i>EcoRI</i> ,<br><i>PacI</i> | Amplification of <i>P</i> <sub>Gmubi</sub> from genomic DNA of<br><i>G. max</i> cv. Willams 82                                    | 917               |
| 6           | TCCCTTACGTCAGTGGAGATTAATTAAGGCTGTC<br>GAGTCAACAATCACAGATAA | <i>PacI</i>                   |                                                                                                                                   |                   |
| 7           | GCTTGCGGCAGCGTGAAGCTTAACATGGTGGAGC<br>ACGACACTC            |                               | Amplification of a <i>DsRed1</i> cassette from<br>pRT104- <i>DsRed1</i>                                                           | 1316              |
| 8           | GGACCTGCAGGCATGCAAGCTTGATTTTGGTTTAA<br>GGAATTAG            |                               |                                                                                                                                   |                   |

|    |                                                          |                               |                                                                                  |      |
|----|----------------------------------------------------------|-------------------------------|----------------------------------------------------------------------------------|------|
| 9  | GACGGCGTGCTGAAGGGCGAAACACACAAGGCC<br>CTGAAGC             |                               | Amplification of pMD19- <i>DsRed1</i> ( $\Delta$ B)                              | 4008 |
| 10 | GCTTCAGGGCCTTGTGTGTTTCGCCCTTCAGCACG<br>CCGTC             |                               |                                                                                  |      |
| 11 | AACATCGATTCTAGAGAATTCCCTTAATTAATCT<br>CCACTGACGTAAGGGATG | <i>EcoRI</i> ,<br><i>PacI</i> | Amplification of a large DNA fragment<br>containing <i>Cas9p</i> and <i>ccdB</i> | 5466 |
| 12 | GAGCCCGGGGTCGACGAATTCTAGCTCGAGAGG<br>CGCGCCAATG          | <i>EcoRI</i>                  |                                                                                  |      |
| 13 | TCCTTTGCTGCCGATTCCACAGG                                  |                               | Amplification of DNA containing pUC18 and                                        | 2846 |
| 14 | ATTGAGAGACCTCTGAAGATAAC                                  |                               | tracrRNA from pYLsgRNA-AtU6-1                                                    |      |
| 15 | GTGGAATCGGCAGCAAAGGAATCCAACATTTAC<br>TTGAGTTAAC          |                               | Amplification of P <sub>MtU6-1</sub> from genomic DNA of                         | 541  |
| 16 | TATCTTCAGAGGTCTCTCAATAAACCTGCTGTTC<br>GTCTAGGC           |                               | <i>M. truncatula</i> R108                                                        |      |
| 17 | GTGGAATCGGCAGCAAAGGATAGGAAATTTGCT<br>GGGAAAC             |                               | Amplification of P <sub>MtU6-26</sub> from genomic DNA of                        | 536  |
| 18 | TATCTTCAGAGGTCTCTCAATAAGCCATTGTGCTC<br>TGTGACG           |                               | <i>M. truncatula</i> R108                                                        |      |
| 19 | CTCCGTTTTACCTGTGGAATCG                                   |                               | Amplification of sgRNA expression cassettes                                      | 634  |
| 20 | CGGAGGAAAATTCCATCCAC                                     |                               |                                                                                  |      |
| 21 | TTCAGAGGTCTCTCTCGCACTGGAATCGGCAGCA<br>AAGG               | <i>BsaI</i>                   | Amplification of sgRNA expression cassettes<br>with <i>BsaI</i> sites            | 673  |
| 22 | AGCGTGGGTCTCGTCAGGGTCCATCCACTCCAAG<br>CTC                | <i>BsaI</i>                   |                                                                                  |      |
| 23 | TTCAGAGGTCTCTCTGACACTGGAATCGGCAGCA<br>AAGG               | <i>BsaI</i>                   | Amplification of sgRNA expression cassettes<br>with <i>BsaI</i> sites            | 677  |



|    |                                        |                                                                                              |      |
|----|----------------------------------------|----------------------------------------------------------------------------------------------|------|
| 24 | AGCGTGGGTCTCGACCGGGTCCATCCACTCCAAG CTC | <i>BsaI</i>                                                                                  |      |
| 25 | TCGGGTACAGACTAGTTCGT                   | Confirmation of CRISPR/Cas9 binary vectors containing sgRNA for <i>GUSPlus</i>               | 670  |
| 26 | CTTCGAATGGCAGGAATCCG                   |                                                                                              |      |
| 27 | TCAACTTATGTACTCTACGC                   | Confirmation CRISPR/Cas9 binary vectors containing sgRNA of <i>MFS1/MFS2</i>                 | 670  |
| 28 | TAATAGTCCAGCTCCGATGC                   |                                                                                              |      |
| 29 | GAGTCCTAATGAAACTTCTG                   | Confirmation of pISV-CRISPR/ <i>Cas9</i> <sub>P<sub>GmUbi</sub></sub> -sgRNA( <i>LYK10</i> ) | 670  |
| 30 | TGGTAAAGTGGTGACCCTTT                   |                                                                                              |      |
| 31 | CATGGTAGATCTGAGGGTAAATTTC              | Detection of mutations in <i>GUSPlus</i>                                                     | 940  |
| 32 | TTCGGAATCTCCACGTTACC                   |                                                                                              |      |
| 33 | ATGGGTTCAGCTGAAAATGTAGAATC             | Detection of mutations in <i>MFS1</i>                                                        | 1169 |
| 34 | TACCTGCTAAGAACTTCAGAGTC                |                                                                                              |      |
| 35 | ATGGGTGGTGTCTCGTTGAATATGAAG            | Detection of mutations in <i>MFS2</i>                                                        | 1166 |
| 36 | CTGCTAAGAACTTCAGAGTCATTAGC             |                                                                                              |      |
| 37 | ATGGCTTCTCTAATTCAACTTGTTTC             | Detection of mutations in <i>LYK10</i>                                                       | 1000 |
| 38 | GTGACATTGCTTTCAGTAATTACC               |                                                                                              |      |
| 39 | ATGAGCCCAGAACGACGCCCCG                 | Detection of the <i>Bar</i> gene in transformed plants                                       | 552  |
| 40 | TCAGATCTCGGTGACGGGCAGG                 |                                                                                              |      |
| 41 | GGAGGCCATAGTGGAATTTTAGGG               | Analysis of possible off-target mutations                                                    | 376  |
| 42 | CATGGTTGTCACTACAATAGAGCCC              |                                                                                              |      |
| 43 | GGATCCTTTTTCTGTTGGCTAGTGG              | Analysis of possible off-target mutations                                                    | 467  |
| 44 | GCCAGACAGCAACTTTTAGAGTTAGC             |                                                                                              |      |
| 45 | CTCTACACCAAGAGACTGGACTGG               | Analysis of possible off-target mutations                                                    | 391  |
| 46 | AGACATGCTAGTTCCAGATACCATCG             |                                                                                              |      |
| 47 | GCAGGAAGCTCCAAGCTTACACAC               | Analysis of possible off-target mutations                                                    | 420  |

|    |                               |                                           |     |
|----|-------------------------------|-------------------------------------------|-----|
| 48 | GCTATATTGACTACACGTGTTAGCCG    |                                           |     |
| 49 | CCAAATGAGTTACAACAGAGTTAGCAGC  | Analysis of possible off-target mutations | 359 |
| 50 | CCAAACAATCTGCAATAGCTTCAGC     |                                           |     |
| 51 | ATGGGAACCCTCGGAAGAGC          | Analysis of possible off-target mutations | 368 |
| 52 | CATACCCATAAAGCATTACTACGACTACC |                                           |     |
| 53 | GCTTCGAGAATGGCAGGTAAGTC       | Analysis of possible off-target mutations | 471 |
| 54 | CCTTAAAGGGTCATAATCACTATCGC    |                                           |     |
| 55 | GGTTGAACTAATGCTGGGACATCG      | Analysis of possible off-target mutations | 395 |
| 56 | GCAGCACAGTGCACTAAAGCTC        |                                           |     |
| 57 | TGGCATACATGTCGATCAATGACG      | Analysis of possible off-target mutations | 426 |
| 58 | CGACGATGATTCAGCGTATGTG        |                                           |     |

**Table S3. Target-specific oligonucleotides used in this study.**

| Name                                               | Sequences (5'→3')                                    | Description             | Length (bp) |
|----------------------------------------------------|------------------------------------------------------|-------------------------|-------------|
| T-F( <i>GUS</i> )-1<br>T-R( <i>GUS</i> )-1         | attgTCGGGTACAGACTAGTTCGT<br>aaacACGAACTAGTCTGTACCCGA | <i>GUSPlus</i> target 1 | 20          |
| T-F( <i>GUS</i> )-2<br>T-R( <i>GUS</i> )-2         | attgCGGATTCCTGCCATTCGAAG<br>aaacCTTCGAATGGCAGGAATCCG | <i>GUSPlus</i> target 2 | 20          |
| T-F( <i>MtMFS1</i> )-1<br>T-R( <i>MtMFS1</i> )-1   | attgTCAACTTATGTACTCTACGC<br>aaacGCGTAGAGTACATAAGTTGA | <i>MtMFS1</i> target 1  | 20          |
| T-F( <i>MtMFS2</i> )-2<br>T-R( <i>MtMFS2</i> )-2   | attgGCATCGGAGCTGGACTATTA<br>aaacTAATAGTCCAGCTCCGATGC | <i>MtMFS2</i> target 2  | 20          |
| T-F( <i>MtLYK10</i> )-1<br>T-R( <i>MtLYK10</i> )-1 | attgGAGTCCTAATGAACTTCTG<br>aaacCAGAAGTTTCATTAGGACTC  | <i>MtLYK10</i> target 1 | 20          |

|                         |                          |                         |    |
|-------------------------|--------------------------|-------------------------|----|
| T-F( <i>MtLYK10</i> )-2 | attgAAAGGGTCACCACTTTACCA | <i>MtLYK10</i> target 2 | 20 |
| T-R( <i>MtLYK10</i> )-2 | aaacTGGTAAAGTGGTGACCCTTT |                         |    |

**Table S4. Sequence analysis of possible off-target sites in *lyk10* mutants.**

| Analyzed mutant | Predicted off-target gene | Predicted off-target site   | Used primers | Amplicon length (bp) | Mutations in obtained sequences |
|-----------------|---------------------------|-----------------------------|--------------|----------------------|---------------------------------|
| <i>lyk10-1</i>  | MTR_2g063570              | AAGTCCTAATGGAAATTCTG AGG *  | 41, 42       | 376                  | No                              |
| <i>lyk10-2</i>  | MTR_2g063570              |                             |              |                      | No                              |
| <i>lyk10-3</i>  | MTR_2g063570              |                             |              |                      | No                              |
| <i>lyk10-1</i>  | MTR_7g029350              | ACGTGCTAATGAACTTCAG TGG *   | 43, 44       | 467                  | No                              |
| <i>lyk10-2</i>  | MTR_7g029350              |                             |              |                      | No                              |
| <i>lyk10-3</i>  | MTR_7g029350              |                             |              |                      | No                              |
| <i>lyk10-1</i>  | MTR_4g127480              | GAGTCCAAATGGAACTGATG AGG *  | 45, 46       | 391                  | No                              |
| <i>lyk10-2</i>  | MTR_4g127480              |                             |              |                      | No                              |
| <i>lyk10-3</i>  | MTR_4g127480              |                             |              |                      | No                              |
| <i>lyk10-1</i>  | MTR_2g069950              | CAGTCCTAATGAAAATGATT TGG *  | 47, 48       | 420                  | No                              |
| <i>lyk10-2</i>  | MTR_2g069950              |                             |              |                      | No                              |
| <i>lyk10-3</i>  | MTR_2g069950              |                             |              |                      | No                              |
| <i>lyk10-1</i>  | MTR_5g024910              | AGAGGATCATCATTTTACCA TGG ** | 49, 50       | 359                  | No                              |
| <i>lyk10-2</i>  | MTR_5g024910              |                             |              |                      | No                              |
| <i>lyk10-3</i>  | MTR_5g024910              |                             |              |                      | No                              |
| <i>lyk10-1</i>  | MTR_3g112020              | AAAGGGTCATCAATTTGGTA TGG ** | 51, 52       | 368                  | No                              |
| <i>lyk10-2</i>  | MTR_3g112020              |                             |              |                      | No                              |
| <i>lyk10-3</i>  | MTR_3g112020              |                             |              |                      | No                              |
| <i>lyk10-1</i>  | MTR_1g054795              | AAAGTGTCACCTCTTTGCGA TAG ** | 53, 54       | 471                  | No                              |

|                |              |                             |        |     |    |
|----------------|--------------|-----------------------------|--------|-----|----|
| <i>lyk10-2</i> | MTR_1g054795 |                             |        |     | No |
| <i>lyk10-3</i> | MTR_1g054795 |                             |        |     | No |
| <i>lyk10-1</i> | MTR_4g116370 | AAAAGGTCACCATTTTACCT TCC ** | 55, 56 | 395 | No |
| <i>lyk10-2</i> | MTR_4g116370 |                             |        |     | No |
| <i>lyk10-3</i> | MTR_4g116370 |                             |        |     | No |
| <i>lyk10-1</i> | MTR_7g056073 | AAAGCTTCACCACTTCACCA TAT ** | 57, 58 | 426 | No |
| <i>lyk10-2</i> | MTR_7g056073 |                             |        |     | No |
| <i>lyk10-3</i> | MTR_7g056073 |                             |        |     | No |

\* Results from <http://skl.scau.edu.cn/offtarget/> using GAGTCCTAATGAACTTCTGTGG (target 1) in *MtLYK10* as query sequence.

\*\* Results from <http://skl.scau.edu.cn/offtarget/> using AAAGGGTCACCACTTTACCATGG (target 2) in *MtLYK10* as query sequence.
